# Supplementary material
Source: Springer Nature journal article supplement (https://www.springermedizin.de/resource/supplementary/12885_2009_2002_MOESM1_ESM.pdf/9460284)

Cumulative survival

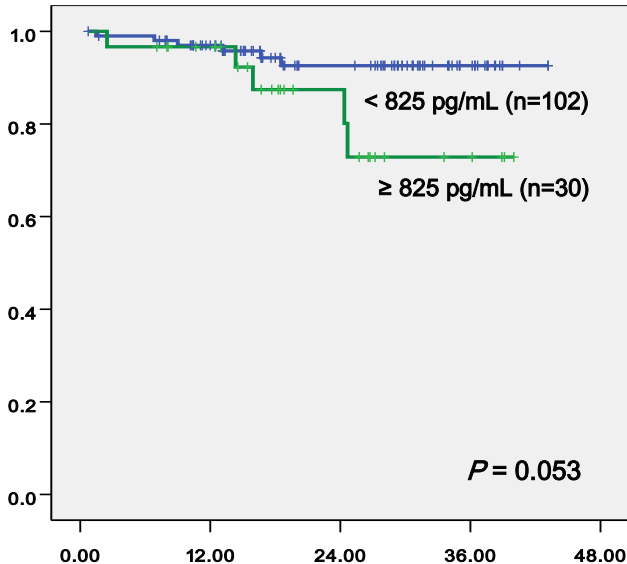

Overall survival (month)

Supplement: MOESM1 [file 9460284]
